# Supplementary material for: A novel imaging method (FIM-ID) reveals that myofibrillogenesis plays a major role in the mechanically induced growth of skeletal muscle
Source: eLife. 2024 Mar 11;12:RP92674. doi: 10.7554/eLife.92674 (PMC10928493; doi:10.7554/eLife.92674)
Supplement: Figure 2—source data 1. [file elife-92674-fig2-data1.xlsx]

## Sheet: Figure 2B Data
File Name	Fiber Number (Top to Bottom)	Quality Score		File Name	Fiber Number (Top to Bottom)	Quality Score		File Name	Fiber Number (Top to Bottom)	Quality Score		File Name	Fiber Number (Top to Bottom)	Quality Score
Actinin and No Stain -15C_5	1	6		Actinin and No Stain -20C_3	1	1		Actinin and No Stain -25C_1	1	3		Actinin and No Stain -30C_3	1	1
Actinin and No Stain -15C_5	2	8		Actinin and No Stain -20C_3	2	1		Actinin and No Stain -25C_1	2	2		Actinin and No Stain -30C_3	2	2
Actinin and No Stain -15C_5	3	7		Actinin and No Stain -20C_3	3	6		Actinin and No Stain -25C_1	3	4		Actinin and No Stain -30C_3	3	2
Actinin and No Stain -15C_5	4	5		Actinin and No Stain -20C_3	4	8		Actinin and No Stain -25C_1	4	2		Actinin and No Stain -30C_3	4	1
Actinin and No Stain -15C_5	5	5		Actinin and No Stain -20C_3	1	1		Actinin and No Stain -25C_3	1	1		Actinin and No Stain -30C_3	5	3
Actinin and No Stain -15C_5	6	5		Actinin and No Stain -20C_3	2	1		Actinin and No Stain -25C_3	2	1		Actinin and No Stain -30C_3	6	4
Actinin and No Stain -15C_5	7	5		Actinin and No Stain -20C_3	3	6		Actinin and No Stain -25C_3	3	2		Actinin and No Stain -30C_3	7	5
Actinin and No Stain -15C_5	8	2		Actinin and No Stain -20C_3	4	8		Actinin and No Stain -25C_3	4	1		Actinin and No Stain -30C_3	8	1
Actinin and No Stain -15C_1	1	8		Actinin and No Stain -20C_4	1	2		Actinin and No Stain -25C_3	5	2		Actinin and No Stain -30C_5	1	5
Actinin and No Stain -15C_1	2	8		Actinin and No Stain -20C_4	2	2		Actinin and No Stain -25C_3	6	1		Actinin and No Stain -30C_5	2	2
Actinin and No Stain -15C_1	3	8		Actinin and No Stain -20C_4	3	4		Actinin and No Stain -25C_5	1	1		Actinin and No Stain -30C_5	3	1
Actinin and No Stain -15C_1	4	7		Actinin and No Stain -20C_4	4	10		Actinin and No Stain -25C_5	2	3		Actinin and No Stain -30C_5	4	2
Actinin and No Stain -15C_1	5	1		Actinin and No Stain -20C_4	5	3		Actinin and No Stain -25C_5	3	2		Actinin and No Stain -30C_5	5	1
Actinin and No Stain -15C_1	6	1		Actinin and No Stain -20C_4	6	6		Actinin and No Stain -25C_5	4	2		Actinin and No Stain -30C_5	6	2
Actinin and No Stain -15C_1	7	2		Actinin and No Stain -20C_4	7	7		Actinin and No Stain -25C_5	5	3		Actinin and No Stain -30C_5	7	3
Actinin and No Stain -15C_1	8	3		Actinin and No Stain -20C_4	8	2		Actinin and No Stain -25C_5	6	3		Actinin and No Stain -30C_4	1	4
Actinin and No Stain -15C_2	1	8		Actinin and No Stain -20C_2	1	6		Actinin and No Stain -25C_5	7	3		Actinin and No Stain -30C_4	2	2
Actinin and No Stain -15C_2	2	7		Actinin and No Stain -20C_2	2	1		Actinin and No Stain -25C_2	1	8		Actinin and No Stain -30C_4	3	2
Actinin and No Stain -15C_2	3	6		Actinin and No Stain -20C_2	3	3		Actinin and No Stain -25C_2	2	8		Actinin and No Stain -30C_4	4	2
Actinin and No Stain -15C_2	4	6		Actinin and No Stain -20C_2	4	2		Actinin and No Stain -25C_2	3	6		Actinin and No Stain -30C_4	5	4
Actinin and No Stain -15C_2	5	6		Actinin and No Stain -20C_5	1	8		Actinin and No Stain -25C_2	4	2		Actinin and No Stain -30C_4	6	4
Actinin and No Stain -15C_2	6	6		Actinin and No Stain -20C_5	2	7		Actinin and No Stain -25C_4	1	1		Actinin and No Stain -30C_4	7	3
Actinin and No Stain -15C_2	7	1		Actinin and No Stain -20C_5	3	6		Actinin and No Stain -25C_4	2	1		Actinin and No Stain -30C_2	1	1
Actinin and No Stain -15C_4	1	1		Actinin and No Stain -20C_5	4	6		Actinin and No Stain -25C_4	3	1		Actinin and No Stain -30C_2	2	1
Actinin and No Stain -15C_4	2	1		Actinin and No Stain -20C_5	5	6		Actinin and No Stain -25C_4	4	2		Actinin and No Stain -30C_2	3	1
Actinin and No Stain -15C_4	3	2		Actinin and No Stain -20C_5	6	5		Actinin and No Stain -25C_4	5	3		Actinin and No Stain -30C_2	4	1
Actinin and No Stain -15C_4	4	2		Actinin and No Stain -20C_5	7	6		Actinin and No Stain -25C_4	6	3		Actinin and No Stain -30C_2	5	1
Actinin and No Stain -15C_4	5	2		Actinin and No Stain -20C_5	8	5		Actinin and No Stain -25C_4	7	1		Actinin and No Stain -30C_2	6	1
Actinin and No Stain -15C_4	6	1		Actinin and No Stain -20C_5	9	4						Actinin and No Stain -30C_2	7	4
Actinin and No Stain -15C_4	7	1		Actinin and No Stain -20C_1	1	1						Actinin and No Stain -30C_2	8	1
Actinin and No Stain -15C_4	8	4		Actinin and No Stain -20C_1	2	7						Actinin and No Stain -30C_1	1	5
Actinin and No Stain -15C_4	9	6		Actinin and No Stain -20C_1	3	2						Actinin and No Stain -30C_1	2	5
Actinin and No Stain -15C_3	1	7		Actinin and No Stain -20C_1	4	4						Actinin and No Stain -30C_1	3	3
Actinin and No Stain -15C_3	2	6		Actinin and No Stain -20C_1	5	6						Actinin and No Stain -30C_1	4	3
Actinin and No Stain -15C_3	3	7		Actinin and No Stain -20C_1	6	6						Actinin and No Stain -30C_1	5	1
Actinin and No Stain -15C_3	4	10										Actinin and No Stain -30C_1	6	3
Actinin and No Stain -15C_3	5	10										Actinin and No Stain -30C_1	7	1
Actinin and No Stain -15C_3	6	6										Actinin and No Stain -30C_1	8	2
Actinin and No Stain -15C_3	7	6
	Average	4.94872			Average	4.54286			Average	2.57143			Average	2.36842
