# Supplementary material for: A novel imaging method (FIM-ID) reveals that myofibrillogenesis plays a major role in the mechanically induced growth of skeletal muscle
Source: eLife. 2024 Mar 11;12:RP92674. doi: 10.7554/eLife.92674 (PMC10928493; doi:10.7554/eLife.92674)
Supplement: Figure 3—source data 1. [file elife-92674-fig3-data1.xlsx]

## Sheet: Figure 3F Data
Myofibril CSA (µm2)
Cell Profiler	User 1	User 2	User 3	User 4	User 5	User 6
1.11738	0.923053	0.983484	0.803376	0.876841	1.13397	0.779678
0.915943	0.910019	1.179	0.646967	0.933717	0.222765	1.08183
0.565207	0.635117	0.638672	0.859067	1.12923	1.11264	0.204991
0.827074	0.564022	0.913574	0.846033	0.862622	1.11264	1.18374
0.844848	0.581796	1.0214	1.27024	0.919498	1.00481	0.492927
0.934902	1.27616	0.878026	0.231059	0.896985	0.926608	0.532029
1.20625	1.0605	1.30815	0.5972	0.804561	0.857882	0.831814
0.857882	1.23824	0.930163	0.605494	0.552173	0.731096	0.465674
0.652891	0.870917	0.681329	0.720432	0.66474	0.817595	0.526105
0.573501	1.05813	0.645782	0.889875	1.18018	0.464489	0.569947
0.52255	0.96097	0.586536	0.841294	0.981114	0.501221	0.837739
0.955046	0.843663	1.05458	0.851958	0.810486	0.530844	0.482263
0.7465	0.771383	0.263052	1.26431	0.635117	0.505961	0.632748
0.543878	0.540324	1.25128	0.995333	0.67185	0.738205	0.606679
0.714507	0.662371	0.955046	1.04747	1.07591	0.644597	0.584166
0.869732	1.09368	1.28919	0.964525	0.212101	0.565207	0.628008
1.19796	0.574686	0.580611	1.18255	1.05339	0.600755	0.700288
1.04747	0.573501	0.591275	0.832999	0.804561	0.316374	0.925423
0.784417	0.682514	0.562837	1.1861	0.541509	0.738205	0.702658
0.266607	1.05695	0.624453	0.793897	1.2335	0.962155	0.491742
0.907649	0.950306	0.626823	0.969265	1.20269	0.539139	0.683699
1.20151	0.892245	0.539139	0.555728	0.947936	0.910019	0.937272
0.742945	1.00363	0.904094	0.734651	0.959786	0.798636	0.771383
1.01666	0.862622	0.73939	1.02022	0.923053	0.894615	0.934902
0.477523	0.568762	0.626823	1.15174	1.006	0.844848	0.468044
0.624453	0.81878	0.712137	0.553358	0.984669	0.783232	0.507146
0.521365	0.359031	0.635117	0.611419	0.477523	0.495297	0.573501
0.542694	0.598385	0.322298	0.707397	0.733466	0.425386	0.815225
0.74176	0.656446	0.786787	0.912389	0.380359	0.708582	0.806931
0.677774	0.994148	0.82115	0.643412	0.803376	0.468044	0.764274
0.547433	0.905279	1.10553	0.530844	0.550988	0.537954	1.16004
0.708582	0.21684	0.933717	0.649336	0.829444	0.586536	0.829444
0.279641	1.06169	1.17663	0.733466	1.22521	1.07709	0.505961
0.629193	1.1944	0.847218	0.66474	0.52018	0.75124	0.899355
0.969265	0.867362	0.715692	0.629193	0.870917	0.882766	1.07472
0.567577	0.752424	0.687254	0.641042	0.639857	0.971635	0.722801
0.714507	0.644597	0.36851	0.648151	0.670665	1.13278	0.404058
0.670665	0.641042	0.853143	0.483448	0.650521	0.757164	0.801006
0.632748	0.526105	0.89343	0.541509	0.632748	0.465674	0.453825
1.01785	0.464489	0.593645	0.565207	0.867362	0.798636	0.582981
0.81167	1.25839	0.889875	0.96808	0.654076	0.815225	0.329408
0.59246	0.857882	1.00007	0.882766	1.15885	0.573501	0.347182
0.96571	0.612604	0.998888	0.715692	0.530844	0.650521	0.801006
0.382729	0.630378	0.577056	0.778493	0.498852	0.729911	0.487002
0.696733	0.707397	0.290306	0.385099	0.631563	0.801006	0.812855
0.622083	0.784417	1.04154	0.892245	0.719247	0.944382	0.764274
0.587721	0.810486	1.07235	0.460934	0.547433	1.06169	0.754794
0.637487	0.846033	0.670665	0.654076	0.415907	0.247648	0.854328
0.905279	0.514255	0.482263	0.470413	0.828259	0.981114	0.712137
0.547433	0.805746	0.82352	0.857882	0.902909	0.604309	0.241724
0.51544	0.523735	0.546248	0.913574	0.261867	0.417092	0.436051
0.8958	1.006	0.436051	0.912389	0.838924	0.632748	0.66948
1.00126	0.559282	1.11146	0.89343	0.52018	0.456194	0.315189
0.860252	1.16952	0.996518	0.620898	1.01548	0.651706	0.581796
0.876841	0.661186	0.534399	0.569947	1.0297	0.59246	0.709767
0.323483	0.477523	1.1553	1.00718	0.707397	0.539139	0.658816
0.750055	0.761904	0.728726	0.97045	1.03917	0.987039	0.44316
0.478708	0.59246	0.558098	0.983484	0.312819	0.759534	0.338887
0.305709	0.774938	0.853143	0.507146	0.668295	0.785602	0.233429
0.658816	0.722801	0.598385	0.677774	1.02614	0.683699	0.412352
1.11975	0.803376	0.620898	0.52255	0.881581	0.804561	0.222765
1.2963	0.500036	0.611419	0.571132	1.00718	0.787972	1.03799
0.783232	0.259498	1.34133	0.449085	0.785602	1.32	0.655261
0.571132	0.235799	0.654076	0.878026	1.29275	0.841294	0.459749
0.646967	0.914759	0.780863	0.857882	0.22869	0.434866	0.699103
0.971635	0.863807	1.0842	0.315189	0.819965	0.779678	0.481078
0.656446	0.908834	0.755979	0.504776	0.459749	0.727541	1.09131
0.561652	1.5321	0.716877	0.270162	1.35792	0.526105	0.610234
0.815225	0.910019	0.687254	0.271347	0.834184	1.00244	0.974005
0.5972	0.649336	0.546248	0.783232	0.569947	0.715692	0.587721
0.764274	1.15174	1.01903	1.10909	0.540324	0.789157	0.617344
0.914759	0.859067	0.918313	0.682514	0.716877	0.250018	0.539139
1.147	0.540324	1.20862	0.482263	0.482263	0.67659	0.862622
0.497667	0.536769	1.21099	0.705028	0.622083	0.254758	0.843663
0.701473	1.25839	0.682514	0.503591	1.07591	1.07828	0.855513
0.673035	0.646967	0.591275	0.725171	0.668295	0.955046	0.910019
0.819965	0.419462	0.849588	0.694363	0.747685	1.01548	1.12094
0.638672	1.1162	0.699103	0.657631	0.731096	1.25839	0.483448
0.995333	0.906464	0.904094	0.944382	0.785602	0.210916	0.789157
0.88869	0.638672	0.931347	0.847218	0.832999	0.655261	0.616159
1.15174	0.720432	0.957416	0.830629	0.872101	0.860252	0.785602
0.942012	0.752424	0.994148	0.989409	0.284381	0.97282	0.827074
0.902909	0.923053	0.930163	1.18729	0.680144	0.409982	0.81167
1.006	0.861437	0.584166	0.930163	0.417092	0.797451	0.905279
1.4148	1.02377	0.411167	1.51433	0.861437	1.01192	0.773753
0.8958	0.566392	1.05576	0.913574	0.657631	0.82352	0.446715
0.926608	1.05813	0.222765	0.808116	1.29986	0.372065	0.887505
0.588905	0.876841	1.48589	0.677774	1.03444	0.543878	0.189587
0.30334	0.240539	1.24061	0.59483	0.52255	0.505961	0.425386
0.945567	0.827074	0.96571	1.19084	0.554543	1.07828	1.32119
0.88869	0.361401	1.19558	0.684884	0.591275	0.449085	1.05813
1.22639	0.855513	0.395763	0.625638	0.51544	0.44316	1.05695
1.16478	0.90054	1.31289	1.07709	0.805746	0.728726	1.23469
0.831814	1.03444	0.844848	0.766644	0.530844	0.870917	0.773753
0.521365	1.35436	0.350736	0.734651	0.457379	0.523735	0.899355
0.89106	0.778493	0.953861	0.686069	0.827074	0.579426	0.2986
0.360216	1.07709	0.59957	0.726356	0.855513	1.00126	1.04154
0.408798	1.27497	1.16478	0.552173	0.7465	1.29512	0.798636
0.930163	0.81878	0.943197	0.96097	0.656446	0.511886	0.899355
1.12567	1.22995	1.4693	0.350736	1.08776	1.0214	0.855513
0.21921	1.11857	0.526105	0.831814	0.978744	0.507146	0.911204
0.513071	0.537954	0.996518	1.12804	0.482263	0.497667	0.586536
1.3911	0.521365	1.07591	0.994148	0.553358	0.870917	0.776123
1.13278	0.861437	0.385099	0.618528	0.289121	0.431311	0.411167
0.425386	0.582981	0.510701	0.847218	0.529659	0.887505	0.436051
0.463304	0.631563	0.661186	1.16122	0.51544	0.7465	0.547433
0.625638	0.568762	0.75124	0.391024	0.581796	0.949121	1.26787
0.658816	0.612604	0.189587	0.81167	1.01311	1.26194	0.81641
0.707397	0.513071	1.05458	1.21217	0.966895	0.578241	0.645782
0.691994	0.926608	0.754794	1.5795	0.686069	0.550988	0.302155
0.259498	1.3354	0.408798	0.831814	0.530844	0.481078	0.44553
0.37325	0.530844	0.642227	1.17189	0.663555	0.902909	0.432496
0.623268	0.894615	0.441975	0.731096	0.625638	0.577056	0.252388
0.412352	1.11264	0.737021	0.74413	0.5972	0.477523	0.497667
0.581796	1.16596	1.07235	0.934902	0.625638	0.552173	0.516625
1.1162	0.876841	0.643412	1.22521	0.552173	0.989409	0.439605
1.06761	0.554543	1.12212	1.42427	1.08776	0.969265	0.680144
0.616159	0.728726	0.67422	0.7465	1.07472	0.716877	0.383914
0.229875	1.04273	0.681329	0.267792	0.687254	0.812855	0.381544
0.662371	0.374435	0.687254	1.01074	0.876841	0.706213	0.236984
0.650521	0.695548	1.21217	1.0925	1.38754	1.20388	0.919498
0.612604	0.934902	0.962155	0.567577	1.51077	0.841294	0.577056
0.558098	0.494112	0.331778	0.431311	1.47049	0.933717	0.247648
0.789157	0.575871	0.830629	0.901724	0.962155	1.1944	0.569947
1.006	0.59009	0.496482	0.482263	0.964525	1.83544	1.01311
0.532029	0.74176	1.16952	1.00837	0.939642	1.47404	0.734651
1.1553	0.641042	1.12094	1.09842	1.15648	0.981114	0.655261
0.949121	0.976374	0.580611	0.680144	1.25128	1.15411	0.476338
0.548618	0.309264	0.580611	0.707397	1.84374	1.03562	0.463304
0.385099	0.655261	0.430126	1.06643	1.42546	1.00363	0.446715
1.01192	0.44079	0.853143	0.505961	0.981114	0.976374	0.947936
0.697918	0.655261	1.03325	0.718062	1.58068	1.53803	0.790342
0.600755	0.686069	0.780863	0.556913	0.906464	1.45864	1.20269
0.96097	0.623268	0.37088	0.610234	1.4148	0.931347	0.951491
0.329408	0.67185	0.639857	0.59009	1.51196	1.52025	0.565207
0.350736	0.82115	0.635117	1.47167	0.952676	2.70873	0.502406
0.731096	0.834184	0.514255	1.16004	0.994148	0.81878	0.547433
0.817595	0.633932	0.564022	0.791527	0.587721	1.29393	1.006
0.612604	0.716877	0.709767	0.874471	1.35555	1.29393	0.740575
0.738205	0.528475	0.926608	0.992963	0.660001	1.91483	0.96808
1.08657	1.01074	0.785602	0.591275	0.379175	0.932532	0.581796
0.45264	0.242909	0.66474	1.19321	0.920683	1.00363	0.231059
0.566392	0.340072	0.67185	1.00363	0.835369	1.48826	0.603125
0.37562	0.786787	1.03088	0.528475	0.878026	0.988224	0.37325
0.428941	1.08894	0.610234	0.836554	1.04036	0.770198	0.856697
0.723986	0.96808	0.658816	1.12094	0.721617	1.30934	0.335332
0.186033	0.978744	1.54751	0.656446	0.693178	0.475153	0.191957
0.681329	0.764274	0.992963	0.438421	0.792712	0.631563	0.514255
0.424202	0.873286	1.09013	0.649336	0.792712	0.462119	0.687254
0.184848	1.11383	1.46219	1.0214	0.481078	0.509516	0.536769
1.03917	1.06643	1.65296	0.540324	0.510701	0.306894	0.536769
1.4302	1.13752	1.09842	0.757164	0.862622	0.619713	0.487002
1.00007	1.05458	1.72287	1.33659	0.699103	0.606679	0.725171
1.03207	1.05932	1.82004	0.637487	0.391024	0.606679	0.89106
0.827074	1.61031	1.07709	0.678959	0.752424	0.7465	0.831814
1.12449	1.13871	0.629193	0.612604	0.874471	0.944382	1.20862
0.913574	1.47286	1.63163	0.381544	0.487002	0.44079	0.955046
1.73709	1.65889	0.59009	0.793897	0.44079	0.451455	1.38399
1.31763	1.11738	0.915943	0.536769	0.521365	0.635117	1.46101
1.04747	1.2655	0.713322	0.706213	0.855513	0.657631	0.919498
0.596015	0.981114	1.1944	0.652891	0.37562	0.605494	1.26787
0.926608	1.62097	1.12449	1.11857	0.639857	0.623268	1.79634
1.13515	1.00244	1.19796	0.409982	0.610234	0.718062	0.772568
1.72761	0.89817	0.928978	0.998888	0.904094	0.683699	1.24298
1.12804	0.587721	0.67659	0.722801	0.720432	0.507146	0.451455
0.59483	1.05813	0.632748	0.755979	0.745315	1.01666	0.723986
1.17189	1.37806	0.920683	0.614974	0.731096	0.645782	1.13397
1.85322	1.27853	1.5084	1.0688	0.726356	0.844848	0.598385
1.12567	1.0688	1.16004	0.488187	0.757164	0.803376	1.06524
1.31408	1.36503	1.17307	0.494112	1.23469	1.13515	1.0451
1.09131	1.58542	0.919498	0.778493	0.755979	0.404058	1.04036
1.05221	1.00955	1.12923	0.625638	0.437236	0.425386	1.21691
0.609049	1.95156	1.16952	0.715692	0.694363	0.521365	1.65652
1.17307	1.47997	2.11627	0.912389	0.97519	0.74887	1.4148
0.926608	0.516625	1.14937	0.745315	1.006	1.79871	1.77383
0.626823	0.696733	1.35199	0.37088	0.995333	1.37569	0.942012
0.777308	0.835369	1.66955	0.771383	0.931347	0.715692	1.01074
0.645782	0.532029	1.09961	0.812855	1.3354	0.708582	1.54869
0.604309	1.01074	1.24772	1.27971	1.35081	0.716877	0.573501
1.15293	1.29275	1.1162	1.13278	1.56528	0.966895	0.90054
0.981114	1.006	1.13634	0.946751	0.989409	1.02377	1.07235
0.841294	1.5558	1.77857	1.53803	0.75124	0.97282	0.981114
0.737021	0.529659	0.668295	0.853143	0.568762	0.880396	1.58542
0.44079	0.745315	0.697918	0.619713	0.566392	0.976374	0.691994
0.887505	1.04154	0.978744	0.983484	0.733466	2.02503	0.558098
0.74887	0.421832	0.464489	1.09961	0.385099	1.31408	0.921868
0.436051	0.782047	0.802191	1.2572	0.498852	0.706213	0.567577
0.862622	0.885136	1.05102	1.58542	0.81641	1.12449	0.341257
0.510701	0.763089	0.899355	1.40058	0.834184	0.631563	0.81878
0.451455	0.713322	0.873286	1.01311	0.689624	0.652891	0.707397
0.947936	0.534399	0.487002	1.32474	0.835369	1.31052	0.760719
0.324668	0.541509	0.691994	1.61623	0.802191	0.782047	0.731096
0.274902	0.530844	0.945567	1.07709	0.471598	0.731096	0.408798
0.59483	0.892245	0.549803	1.7051	0.88869	0.402873	0.889875
0.176553	0.97282	0.600755	0.995333	0.549803	0.641042	0.606679
0.998888	0.838924	0.89106	1.60675	0.646967	0.920683	0.902909
0.59957	0.532029	0.978744	1.13634	0.682514	0.388654	0.351921
0.456194	0.566392	1.22284	1.07828	0.728726	0.650521	0.510701
0.431311	0.921868	0.484632	1.33896	0.859067	0.59246	0.462119
0.864992	1.02496	0.864992	1.36384	0.89817	0.723986	1.16715
0.668295	0.857882	0.560467	1.21099	1.44442	0.279641	1.05932
0.476338	0.363771	0.502406	0.734651	0.838924	0.757164	0.849588
1.00481	0.670665	0.462119	0.81167	0.924238	0.44316	1.15648
1.27616	1.29986	0.250018	1.10316	1.05458	0.530844	0.606679
1.01192	0.82115	0.579426	1.13871	1.14819	0.457379	0.757164
0.872101	0.82352	0.607864	0.894615	0.977559	0.920683	0.89817
0.727541	0.899355	0.828259	0.785602	0.815225	0.683699	0.81878
0.566392	0.774938	1.18847	0.67659	0.728726	0.944382	0.44316
0.964525	0.578241	0.468044	0.969265	1.26431	0.735836	1.00363
0.81167	0.59009	0.760719	1.179	0.887505	0.997703	0.755979
0.618528	0.44316	0.778493	1.7288	0.579426	1.17189	0.513071
0.955046	1.22165	0.925423	0.784417	1.04865	0.537954	0.513071
0.420647	2.2395	0.681329	1.57239	0.937272	1.01548	0.44553
1.04273	1.10435	1.14108	1.08183	0.861437	1.06524	0.7465
1.04036	1.14108	1.07117	0.982299	0.96334	1.61386	0.498852
1.17189	0.868547	1.0368	0.836554	0.81404	0.856697	0.437236
1.08302	0.482263	1.1079	1.90417	0.827074	0.709767	0.485817
0.764274	1.44205	1.13989	1.10672	0.507146	0.930163	0.769013
1.33659	1.35436	1.13041	0.549803	0.874471	0.687254	0.60194
0.52255	0.96571	1.16596	0.998888	1.19203	1.01429	0.507146
0.857882	1.50248	0.82115	0.600755	1.18729	0.783232	0.868547
1.42783	0.883951	1.32593	0.727541	0.607864	0.738205	1.07354
1.493	0.731096	0.837739	0.96334	0.409982	0.605494	0.953861
1.32948	0.896985	0.526105	0.801006	0.924238	0.737021	1.31645
0.799821	0.758349	1.35436	0.455009	0.658816	0.720432	1.06169
0.851958	0.681329	0.806931	0.896985	0.555728	0.511886	1.01903
0.842478	1.41717	0.727541	0.913574	0.714507	0.859067	0.81167
0.849588	1.54514	1.42546	0.860252	1.05695	0.853143	0.805746
0.815225	1.04984	0.918313	0.257128	0.316374	0.856697	1.28208
0.344812	0.943197	1.49656	0.59957	0.841294	0.673035	1.16122
0.860252	1.01903	0.859067	0.545063	0.650521	0.848403	0.765459
1.51077	0.74176	0.896985	1.07354	1.31526	0.742945	1.19321
0.908834	1.22284	0.872101	0.706213	0.675405	0.469228	0.686069
0.879211	1.62808	1.38517	0.425386	0.695548	0.332963	0.710952
0.386284	0.849588	0.850773	1.09368	1.00244	0.562837	1.3354
0.498852	1.00837	0.875656	0.990593	1.3354	1.33777	0.851958
0.874471	0.727541	0.430126	0.962155	1.09368	0.876841	0.598385
0.841294	0.750055	0.52018	1.23587	0.535584	0.560467	0.587721
0.59246	0.870917	0.862622	0.872101	0.97519	0.614974	1.50603
0.475153	0.328223	0.848403	1.01785	0.562837	0.466859	0.745315
0.67659	0.630378	0.959786	0.652891	0.52492	0.418277	0.843663
0.75124	0.556913	0.437236	0.580611	0.915943	0.465674	0.776123
0.411167	0.838924	0.593645	0.74176	0.678959	0.686069	0.458564
0.859067	0.809301	0.693178	0.808116	0.896985	0.889875	0.779678
0.863807	1.25957	0.567577	1.0688		1.23232	0.302155
0.731096	0.902909	1.09487	0.701473		1.29275	0.432496
0.572317	0.487002	0.855513	0.428941		0.660001	0.757164
0.910019	1.006	1.18137	0.495297		0.684884	0.581796
0.532029	0.866177	0.842478	0.908834		1.30223	0.644597
0.488187	0.82589	0.44079	0.37562		0.992963	0.490557
0.938457	0.990593	0.786787	0.66948		1.40413	0.391024
0.617344	0.808116	1.25128	1.42072		0.697918	0.406428
0.964525	0.772568	0.88632	1.22639		0.705028	0.840109
1.28208	0.687254	0.629193	0.8958		1.07117	0.940827
0.553358	0.879211	0.487002	0.418277		0.782047	1.03799
0.850773	0.779678	0.588905	0.696733		1.17307	0.427756
0.596015	1.08539	0.964525	0.651706		0.385099	0.728726
0.802191	0.949121	1.11027	0.947936		1.12923	0.770198
1.05339	0.614974	1.23587	0.942012		0.382729	0.866177
0.955046	1.09131	1.05813	0.812855		0.957416	1.0297
0.769013	1.08657	0.755979	0.946751		0.588905	0.424202
0.735836	0.51544	0.44553	0.991778		0.528475	0.774938
0.847218	0.835369	0.649336	0.969265		0.683699	0.694363
1.11975	0.663555	1.24535	1.19558		0.581796	0.644597
0.607864	1.08657	0.882766	1.13752		1.03088	1.0368
1.05339	1.48589	0.444345	0.327038		0.949121	0.976374
0.348367	1.22521	1.05458	0.67422		0.797451	0.913574
0.379175	0.568762	0.784417	0.712137		0.809301	0.537954
1.27024	0.45264	0.804561	1.93023		0.89106	0.880396
0.978744	0.419462	0.772568	1.22047		0.572317	0.880396
0.59246	0.511886	0.82589	1.22639		1.06406	0.677774
0.340072	0.769013	1.04391	0.655261		0.902909	0.299785
1.22165	0.840109	0.59483	0.73939		0.971635	0.2986
1.00244	0.729911	0.940827	1.25128		1.12449	0.251203
0.535584	0.992963	1.01666	1.44797		0.978744	0.406428
0.745315	1.11264	0.571132	1.16952		0.792712	1.01785
0.846033	0.719247	0.565207	0.799821			0.937272
0.362586	0.81641	0.45264	0.713322			0.8958
1.1079	0.770198	0.626823	0.716877			0.835369
0.979929	0.619713	0.945567	1.34014			0.691994
0.797451	0.668295	1.06524	1.31408			0.927793
0.774938	0.458564	0.633932	1.73117			0.516625
0.782047	0.917128	0.815225	0.349552			0.598385
0.81404	1.27971	0.779678	0.626823			0.861437
1.44442	0.706213	0.824705	0.575871			0.37325
0.614974	0.495297	0.760719	0.732281			0.355476
0.74413	0.859067	1.13278	0.686069			0.562837
1.20862	0.966895	0.423017	0.424202			0.585351
0.406428	1.1861	0.75124	0.335332			1.05339
0.860252	0.670665	1.27142	0.596015			0.539139
0.733466	1.04865	1.06998	0.406428			0.510701
1.52855	0.646967	0.7465	0.82352			0.73939
0.932532	0.911204	0.521365	0.752424			0.626823
1.22165	1.09013	1.33422	1.01074			0.680144
0.624453	1.25483	0.619713	0.721617			0.575871
0.776123	1.1553	1.11501	0.382729			1.34962
1.34489	1.12212	0.931347	0.67185			1.48115
1.1079	0.819965	1.179	0.534399			0.974005
0.579426	0.842478	0.709767	0.353106			0.805746
0.464489	0.663555	1.0368	0.958601			0.925423
0.700288	0.540324	0.59246	0.477523			0.264237
0.5972	0.562837	0.684884	0.382729			0.521365
0.738205	1.04984	1.01666	0.44553			0.977559
0.949121	0.688439	1.12094	0.859067			0.828259
1.33303	0.737021	0.949121	0.777308			0.568762
0.575871	1.35318	0.755979	0.673035			1.14463
0.731096	1.1233	1.26905	0.460934			0.514255
0.883951	0.658816	0.681329	0.899355			0.706213
1.03562	1.31052	1.08539	0.708582			0.808116
1.10079	0.829444	0.626823	0.709767			0.996518
0.767828	0.630378	0.776123	0.714507			0.911204
1.00007	0.677774	0.568762	0.578241			0.912389
1.07235	1.42783	0.558098	0.645782			0.701473
1.21099	1.31645	0.619713	0.763089			1.04747
1.16715	1.50011	1.40532	0.312819			1.08065
1.0925	0.407613	0.81404	0.799821			0.969265
1.03917	0.67659	0.798636	1.1707			1.10316
0.722801	0.930163	1.50722	0.990593			0.5972
0.656446	1.45745	1.14463	0.332963			1.01074
0.636302	0.637487	1.01785	0.806931			0.507146
0.990593	0.990593	0.802191	1.17189			0.646967
0.860252	0.613789	1.08302	1.02614			0.910019
0.684884		1.13989	0.946751			0.644597
0.67185		1.01903	0.742945			0.643412
		1.50129	0.45264			0.501221
		1.02614	0.636302			0.569947
			0.848403			0.545063
			1.46219			1.22876
			1.08776			0.609049
			0.873286			0.677774
			0.752424			0.855513
			0.574686			1.2572
			0.553358			1.00126
			0.752424			0.940827
			0.628008			0.66711
			0.526105
			0.584166
			0.334148
			1.0688
			0.82589
			0.844848
			0.97519
			0.822335
			0.66711
			0.74176
			1.70866
			1.30934
			1.00481
			1.14345
			0.677774
			0.632748
			0.652891
			1.25483
			0.436051
			0.483448
			0.74887
			0.573501
			0.860252
			0.969265
			0.582981
			0.976374
			0.556913
			0.837739
			0.90054
			0.997703
			1.01666
			0.767828
			1.12686
			0.879211
			0.661186
			1.02614
			0.569947
			0.491742
			0.567577
			1.03917
			0.578241
			0.511886
			1.30697
			1.00481
			0.588905
			0.657631
			0.835369
			0.609049
			0.542694

## Sheet: Figure 3G Data
ROI Image	Human Measurements (AVG)						Human Average	Cell Profiler (AVG)
1	0.788173	0.791922	0.817921	0.758977	0.742416	0.658877	0.759714	0.74212
2	0.811508	0.855488	0.728726	0.818839	0.708305	0.741422	0.777381	0.811177
3	0.699285	0.736073	0.712927	0.766383	0.747732	0.584271	0.707778	0.623114
4	1.12479	1.20015	1.13191	1.14376	1.23372	1.09009	1.15407	1.08512
5	0.75274	0.746463	0.690448	0.759645	0.634906	0.690146	0.712391	0.704007
6	1.10321	1.0027	0.949437	0.996629	0.971742	0.919301	0.990503	0.987264
7	0.812855	0.804184	0.7903	0.697639	0.748433	0.673652	0.75451	0.746204
8	0.891943	0.916022	0.830234	0.801192	0.833338	0.81196	0.847448	0.89276
