# Supplementary material for: A novel imaging method (FIM-ID) reveals that myofibrillogenesis plays a major role in the mechanically induced growth of skeletal muscle
Source: eLife. 2024 Mar 11;12:RP92674. doi: 10.7554/eLife.92674 (PMC10928493; doi:10.7554/eLife.92674)
Supplement: Figure 4—source data 1. [file elife-92674-fig4-data1.xlsx]

## Sheet: Figure 4C Data
	Myofiber CSA (μm2)	Thunder (Myofibril CSA, μm2)	EM (Myofibril CSA, μm2)
JCB604 OX (THUN)	517.278	0.530047
	615.393	0.564759
	516.712	0.531769
	643.227	0.648517
	457.292	0.529794
	566.039	0.560866
	496.145	0.507868
	635.717	0.543596
	578.356	0.558488
	415.445	0.521879
	436.699	0.488832
	467.174	0.530331
	604.824	0.527157
	411.656	0.549279
	950.774	0.564264
	479.562	0.530252
	551.255	0.518789
	705.293	0.542239
JCB607 OX (THUN)	729.243	0.557772
	721.567	0.579789
	646.842	0.524709
	517.563	0.585065
	884.96	0.580109
	344.698	0.4963
	389.666	0.534287
	773.002	0.524712
	574.012	0.504589
	555.488	0.562093
	618.884	0.530127
	442.486	0.546258
	440.62	0.527885
	682.052	0.626225
	728.307	0.626666
	775.327	0.588158
	954.624	0.554052
	787.531	0.536935
JCB604 OX (EM)	900.977		0.671522
	1163.49		0.965644
	971.262		0.614864
	419.125		0.514745
	461.286		0.507996
	559.681		0.556398
	638.016		0.585801
	552.363		0.558117
	339.25		0.469104
	591.192		0.727948
	1193.1		0.695215
	862.139		0.723094
	518.165		0.545042
	863.259		0.554762
	703.892		0.568253
	871.201		0.474117
	757.904		0.445652
	520.971		0.366732
	715.135		0.456064
	481.755		0.6048
JCB607 OX (EM)	562.702		0.532173
	622.238		0.672249
	677.424		0.587345
	625.772		0.508726
	597.881		0.528111
	439.739		0.491483
	789.511		0.573096
	549.536		0.515993
	760.845		0.549384
	482.562		0.534744
	703.11		0.708588
	573.693		0.693945
	556.141		0.609592
	669.615		0.635896
	631.555		0.757369
	583.456		0.766561
	567.826		0.663521
	388.147		0.49235
	567.151		0.628226
	431.751		0.549723
JCB605 OX (THUN)	780.399	0.588228
	843.394	0.593878
	432.927	0.502915
	889.596	0.604245
	729.077	0.527108
	430.756	0.522434
	604.625	0.585278
	567.797	0.567982
	580.994	0.573122
	429.884	0.485547
	712.503	0.503807
	313.87	0.51703
	446.265	0.530718
	784.951	0.542648
	752.414	0.535473
	596.218	0.583202
	571.772	0.570182
	697.361	0.515504
JCB606 OX (THUN)	603.345	0.515453
	502.311	0.502575
	570.166	0.544213
	525.282	0.510076
	568.727	0.549536
	490.333	0.525384
	369.367	0.495388
	604.664	0.561135
	511.79	0.519346
	562.751	0.561726
	673.806	0.557845
	636.538	0.500374
	505.523	0.492518
	696.508	0.587849
	539.141	0.523711
	561.26	0.536664
	637.685	0.563684
	367.811	0.540415
JCB605 OX (EM)	459.65		0.412424
	525.605		0.456491
	499.184		0.603578
	650.451		0.5398
	372.748		0.566541
	729.788		0.594202
	721.382		0.739697
	1026.21		0.66237
	801.082		0.653867
	777.935		0.690472
	984.677		0.631394
	551.265		0.656349
	717.956		0.435803
	716.843		0.474251
	912.783		0.678252
	947.438		0.627787
	948.592		0.648976
	712.201		0.576266
	323.366		0.375426
	1347.88		0.711853
JCB606 OX (EM)	643.433		0.628439
	509.228		0.760087
	747.379		0.679176
	693.608		0.626546
	790.774		0.637027
	670.918		0.599454
	901.741		0.624406
	724.188		0.638597
	298.562		0.471366
	626.32		0.576136
	441.759		0.518878
	520.528		0.656416
	907.01		0.518218
	842.621		0.614419
	1149.22		0.655967
	957.605		0.594389
	777.958		0.5678
	502.739		0.449531
	534.995		0.666453
	396.534		0.460483
JCB604 NONOX (THUN)	1024.22	0.584647
	999.48	0.592097
	1300.31	0.590702
	1211.07	0.737835
	1169.33	0.742995
	1164.16	0.734025
	1543.24	0.669399
	1626.73	0.65752
	1478.24	0.662228
	1576.63	0.626831
	1311.26	0.620683
	847.322	0.676507
	1433.75	0.600862
	1238.04	0.529963
	1191.43	0.601243
	1420.92	0.676476
	1245.91	0.690566
	1205.24	0.647667
JCB607 NONOX (THUN)	1499.16	0.652413
	1675.16	0.67452
	1638.35	0.724462
	1326.3	0.646752
	1876.68	0.902339
	1837.27	0.824801
	1133.58	0.652374
	1360.42	0.600111
	1452.12	0.658152
	1410.52	0.799563
	1855	0.833978
	1434.02	0.818637
	1489.69	1.0198
	1191.09	0.856927
	1427	0.837929
	1930.16	0.77134
	1809.2	0.675862
	1777.42	0.686871
JCB605 NONOX (THUN)	1371.62	0.923773
	1719.89	0.924082
	1368.11	0.748754
	1946.17	0.76149
	1790.1	0.929279
	1470.33	0.877972
	1604.78	0.622738
	1439.67	0.58827
	1455.72	0.561728
	1175.22	0.652242
	1762.31	0.78936
	1119.33	0.539508
	1176.85	0.591968
	1494.59	0.646294
	1651.51	0.62994
	1512.83	0.642152
	1135.73	0.654727
	1643.56	0.611639
JCB606 NONOX (THUN)	1540.55	0.656036
	1147.76	0.626783
	1210.66	0.570585
	1345.99	0.688834
	1337.37	0.647464
	1373.29	0.673694
	1340.26	0.694242
	1539.66	0.771492
	1358.97	0.72522
	1585.53	0.79339
	1707.19	0.820772
	1292.1	0.731923
	1367.76	0.696598
	1441.5	0.727826
	1064.66	0.614367
	1376.9	0.652044
	1354.5	0.664696
	1314.47	0.664654
JCB604 NONOX (EM)	1974.32		0.754544
	1626.42		0.71094
	1931.42		0.933226
	1452.1		0.693157
	2015.82		0.613196
	1598.85		0.637408
	1517.58		0.526434
	1653.95		0.767921
	1289.45		0.626782
	1795.25		0.7082
	1987.98		0.675338
	1243.34		0.614463
	1242.63		0.625063
	1666.71		0.79662
	1662.59		0.878535
	1196.24		0.590963
	1229.07		0.601431
	1004.74		0.513349
	1711.82		0.565141
	2058.34		0.570716
JCB607 NONOX (EM)	1979.62		0.587541
	1744.58		0.732044
	1547.04		0.88796
	1169.44		0.679617
	2363.57		1.03729
	1371.61		0.604097
	1612.61		0.715531
	1498.21		0.730589
	1770.5		0.913053
	1418.25		0.777156
	1206.43		0.710136
	1870.89		0.756734
	2025.02		0.947951
	1841.31		0.682891
	1885.88		0.708517
	1588.03		0.729632
	1314.73		0.767164
	2456.08		1.10298
	1543.21		0.82861
	1053.99		0.804126
JCB605 NONOX (EM)	1231.93		0.721659
	1222.68		0.750018
	1462.11		0.78315
	1483.31		0.697972
	1059.05		0.580677
	1251.85		0.697366
	2132.13		0.786066
	1909.25		0.756554
	2390.94		0.750519
	2001.99		0.694395
	2318.89		0.829888
	2334.44		0.708515
	1157.82		0.594192
	1277.19		0.726629
	1488.96		0.680607
	1545.99		0.910117
	1566.14		1.07853
	1863.58		0.882994
	1968.97		0.750649
	1651.46		1.0171
JCB606 NONOX (EM)	1519.1		0.691602
	1208.21		0.781235
	1881.82		0.955025
	1434.6		0.753608
	1844.94		0.828065
	1990.21		0.838467
	1326.67		0.707561
	1884.89		0.861068
	1781.98		0.731947
	2037.37		0.893953
	1359.83		0.652985
	1785.51		0.66852
	1260.13		0.658322
	1908.17		0.721151
	1475.02		0.674569
	2051.68		0.762815
	1507.7		0.600812
	1355.5		0.817458
	1640.71		0.839904
	1241.08		0.680205

## Sheet: Figure 4D Data
	Myofiber Area (μm2)	Thunder (Myofibril #)	EM (Myofibril #)
JCB604 OX (THUN)	517.278	746.422
	615.393	866.615
	516.712	759.984
	643.227	793.103
	457.292	690.375
	566.039	799.164
	496.145	779.962
	635.717	911.343
	578.356	820.422
	415.445	604.254
	436.699	668.477
	467.174	659.185
	604.824	877.773
	411.656	581.824
	950.774	1301.82
	479.562	735.765
	551.255	869.331
	705.293	1055.73
JCB607 OX (THUN)	729.243	1024.56
	721.567	976.882
	646.842	965.856
	517.563	676.563
	884.96	1190.33
	344.698	510.862
	389.666	577.637
	773.002	1196.07
	574.012	891.439
	555.488	753.934
	618.884	876.84
	442.486	611.53
	440.62	617.442
	682.052	820.762
	728.307	875.783
	775.327	1012.69
	954.624	1329.38
	787.531	1136.36
JCB604 OX (EM)	900.977		1035.91
	1163.49		1003.49
	971.262		1277.12
	419.125		598.995
	461.286		744.755
	559.681		777.054
	638.016		842.335
	552.363		751.456
	339.25		560.804
	591.192		672.775
	1193.1		1392.48
	862.139		977.914
	518.165		696.193
	863.259		1263.87
	703.892		1067.42
	871.201		1445.23
	757.904		1289.95
	520.971		1145.47
	715.135		1279.44
	481.755		651.02
JCB607 OX (EM)	562.702		824.84
	622.238		706.182
	677.424		969.367
	625.772		929.211
	597.881		843.602
	439.739		661.451
	789.511		1134.61
	549.536		760.657
	760.845		1178.99
	482.562		693.956
	703.11		833.42
	573.693		660.604
	556.141		829.571
	669.615		839.886
	631.555		641.422
	583.456		550.115
	567.826		707.715
	388.147		566.587
	567.151		681.395
	431.751		608.747
JCB605 OX (THUN)	780.399	1048.45
	843.394	1136.46
	432.927	648.654
	889.596	1165.98
	729.077	1068.76
	430.756	646.431
	604.625	807.234
	567.797	800.103
	580.994	800.469
	429.884	670.932
	712.503	1116.32
	313.87	453.484
	446.265	644.271
	784.951	1116.4
	752.414	1097.86
	596.218	775.003
	571.772	763.39
	697.361	1033.73
JCB606 OX (THUN)	603.345	912.843
	502.311	737.022
	570.166	792.032
	525.282	768.472
	568.727	775.176
	490.333	694.876
	369.367	551.253
	604.664	827.085
	511.79	731.577
	562.751	777.628
	673.806	969.02
	636.538	1027.65
	505.523	760.156
	696.508	896.792
	539.141	776.144
	561.26	808.682
	637.685	879.976
	367.811	531.257
JCB605 OX (EM)	459.65		869.435
	525.605		925.508
	499.184		563.817
	650.451		892.35
	372.748		476.374
	729.788		871.957
	721.382		697.73
	1026.21		1078.24
	801.082		923.061
	777.935		853.064
	984.677		1064.34
	551.265		658.496
	717.956		1239.33
	716.843		1245.42
	912.783		951.968
	947.438		1137.04
	948.592		1092.9
	712.201		831.196
	323.366		641.341
	1347.88		1495.56
JCB606 OX (EM)	643.433		781.232
	509.228		497.292
	747.379		763.108
	693.608		852.256
	790.774		926.083
	670.918		821.063
	901.741		1167.97
	724.188		843.293
	298.562		489.311
	626.32		827.491
	441.759		673.812
	520.528		602.612
	907.01		1413.43
	842.621		1082.98
	1149.22		1343.64
	957.605		1195.89
	777.958		1199.7
	502.739		906.028
	534.995		649.412
	396.534		689.058
JCB604 NONOX (THUN)	1024.22	1407.4
	999.48	1304.7
	1300.31	1726.07
	1211.07	1294.92
	1169.33	1248.93
	1164.16	1294.99
	1543.24	1825.63
	1626.73	1962.18
	1478.24	1774.57
	1576.63	1916.36
	1311.26	1621.23
	847.322	953.69
	1433.75	1842.41
	1238.04	1815.8
	1191.43	1501.92
	1420.92	1706.43
	1245.91	1493.04
	1205.24	1512.63
JCB607 NONOX (THUN)	1499.16	1832.75
	1675.16	1968.02
	1638.35	1794.16
	1326.3	1614.04
	1876.68	1666.42
	1837.27	1784.08
	1133.58	1390.45
	1360.42	1804.92
	1452.12	1788.56
	1410.52	1374.17
	1855	1743.82
	1434.02	1361.8
	1489.69	1153.88
	1191.09	1084.66
	1427	1311.64
	1930.16	1946.67
	1809.2	2071.6
	1777.42	2022.85
JCB605 NONOX (THUN)	1371.62	1169.57
	1719.89	1467.67
	1368.11	1425.7
	1946.17	2059.64
	1790.1	1533.14
	1470.33	1329.66
	1604.78	2045.21
	1439.67	1930.31
	1455.72	2163.92
	1175.22	1437.82
	1762.31	1788.87
	1119.33	1619.66
	1176.85	1510.27
	1494.59	1821.37
	1651.51	2111.64
	1512.83	1793.17
	1135.73	1345.43
	1643.56	2129.24
JCB606 NONOX (THUN)	1540.55	1835.56
	1147.76	1381.38
	1210.66	1571.53
	1345.99	1497.72
	1337.37	1589.1
	1373.29	1569.13
	1340.26	1429.23
	1539.66	1531.76
	1358.97	1454.99
	1585.53	1583.44
	1707.19	1682.97
	1292.1	1371.64
	1367.76	1494.58
	1441.5	1527.25
	1064.66	1305.59
	1376.9	1611.51
	1354.5	1589.65
	1314.47	1503.58
JCB604 NONOX (EM)	1974.32		2168.41
	1626.42		2116.44
	1931.42		1741.78
	1452.1		1721.4
	2015.82		2728.23
	1598.85		1909.03
	1517.58		2477.76
	1653.95		1862.82
	1289.45		1751.01
	1795.25		2089.73
	1987.98		2400.57
	1243.34		1663.11
	1242.63		1511.28
	1666.71		1857.81
	1662.59		1585.3
	1196.24		1620.47
	1229.07		1735.46
	1004.74		1488.1
	1711.82		2522.44
	2058.34		3090.66
JCB607 NONOX (EM)	1979.62		2876.73
	1744.58		1973.46
	1547.04		1487.25
	1169.44		1448.54
	2363.57		1937.62
	1371.61		1858.19
	1612.61		1899.88
	1498.21		1661.71
	1770.5		1680.18
	1418.25		1565.83
	1206.43		1414.92
	1870.89		2028.22
	2025.02		1895.69
	1841.31		2308.88
	1885.88		2082.41
	1588.03		1726.68
	1314.73		1313.02
	2456.08		1821.81
	1543.21		1573.07
	1053.99		1050.88
JCB605 NONOX (EM)	1231.93		1354.1
	1222.68		1261.83
	1462.11		1524.57
	1483.31		1612.61
	1059.05		1448.36
	1251.85		1380.67
	2132.13		2327.7
	1909.25		1986.92
	2390.94		2535.96
	2001.99		2305.81
	2318.89		2144.52
	2334.44		2664.02
	1157.82		1448.13
	1277.19		1376.7
	1488.96		1669.72
	1545.99		1382.13
	1566.14		1116.45
	1863.58		1671.06
	1968.97		1855.06
	1651.46		1248.64
JCB606 NONOX (EM)	1519.1		1880.68
	1208.21		1289.99
	1881.82		1705.64
	1434.6		1526.29
	1844.94		1878.93
	1990.21		1996.81
	1326.67		1376.34
	1884.89		1898.95
	1781.98		2021.3
	2037.37		1909.5
	1359.83		1814.1
	1785.51		2208.31
	1260.13		1665.22
	1908.17		2189.89
	1475.02		1870.91
	2051.68		2221.31
	1507.7		2165.69
	1355.5		1349.9
	1640.71		1677.9
	1241.08		1387.47

## Sheet: Figure 4E Data
Myofibril CSA (µm2) / Fiber CSA (µm2) x 1000
ALL EM	ALL THUNDER	Oxidative (EM)	Nonox (EM)	Oxidative (THUN)	Nonox (THUN)
0.745326	1.02469	0.745326	0.382179	1.02469	0.570822
0.829955	0.917721	0.829955	0.437119	0.917721	0.592405
0.633057	1.02914	0.633057	0.483182	1.02914	0.454277
1.22814	1.00822	1.22814	0.477347	1.00822	0.609243
1.10126	1.15855	1.10126	0.304192	1.15855	0.6354
0.994134	0.990862	0.994134	0.398666	0.990862	0.63052
0.91816	1.02363	0.91816	0.346891	1.02363	0.433762
1.01042	0.855091	1.01042	0.464295	0.855091	0.404197
1.38277	0.965647	1.38277	0.486086	0.965647	0.447986
1.23132	1.25619	1.23132	0.394486	1.25619	0.397578
0.582698	1.11938	0.582698	0.339711	1.11938	0.473349
0.83872	1.13519	0.83872	0.494204	1.13519	0.798406
1.05187	0.871588	1.05187	0.503015	0.871588	0.419085
0.642637	1.33432	0.642637	0.477958	1.33432	0.428067
0.807302	0.593479	0.807302	0.528413	0.593479	0.50464
0.544211	1.1057	0.544211	0.494016	1.1057	0.476082
0.588006	0.941106	0.588006	0.489337	0.941106	0.554267
0.703939	0.768813	0.703939	0.510925	0.768813	0.537376
0.637731		0.637731	0.330141
1.25541	0.753753	1.25541	0.27727	0.753753	0.67349
	0.704152			0.704152	0.537292
0.897258	1.16166	0.897258	0.585797	1.16166	0.54729
0.868506	0.679235	0.868506	0.613421	0.679235	0.391275
1.20913	0.72298	1.20913	0.535629	0.72298	0.519121
0.829885	1.21283	0.829885	0.470552	1.21283	0.597126
1.5199	0.968003	1.5199	0.548299	0.968003	0.388052
0.814212	1.00032	0.814212	0.557069	1.00032	0.408615
1.02539	0.986452	1.02539	0.368677	0.986452	0.385878
0.64545	1.12948	0.64545	0.396257	1.12948	0.554994
0.81623	0.707094	0.81623	0.313901	0.707094	0.447912
0.887571	1.64728	0.887571	0.346853	1.64728	0.48199
0.641219	1.18925	0.641219	0.357882	1.18925	0.503013
1.19062	0.691315	1.19062	0.303505	0.691315	0.432421
0.607005	0.711673	0.607005	0.513197	0.711673	0.381433
0.661583	0.97817	0.661583	0.568927	0.97817	0.42447
0.74306	0.99722	0.74306	0.457101	0.99722	0.576483
0.662615	0.73922	0.662615	0.588695	0.73922	0.372143
0.684147		0.684147	0.688653
0.809134	0.854325	0.809134	0.473816	0.854325	0.425844
1.16099	1.00052	1.16099	0.381239	1.00052	0.546093
0.528127	0.954482	0.528127	0.615881	0.954482	0.4713
	0.971051			0.971051	0.511767
0.976697	0.966256	0.976697	0.455271	0.966256	0.484133
1.49263	1.07148	1.49263	0.646603	1.07148	0.490569
0.908743	1.34118	0.908743	0.507501	1.34118	0.517992
0.903315	0.928012	0.903315	0.525309	0.928012	0.501078
0.805574	1.01476	0.805574	0.44883	1.01476	0.533654
0.893483	0.998179	0.893483	0.421295	0.998179	0.500395
0.692445	0.827901	0.692445	0.533336	0.827901	0.480773
0.881811	0.786086	0.881811	0.456827	0.786086	0.56646
1.57879	0.974276	1.57879	0.41075	0.974276	0.509299
0.919875	0.843994	0.919875	0.438778	0.843994	0.50491
1.17457	0.971381	1.17457	0.480195	0.971381	0.577054
1.26106	0.956177	1.26106	0.374414	0.956177	0.47356
0.571348	0.883953	0.571348	0.522423	0.883953	0.490732
0.729176	1.46927	0.729176	0.377928	1.46927	0.505642
0.570795		0.570795	0.457328
0.620704	0.764864	0.620704	0.3718	0.764864	0.435186
0.72986	0.803513	0.72986	0.398497	0.803513	0.402661
0.894164	0.811185	0.894164	0.603068	0.811185	0.442189
1.24572	1.13042	1.24572	0.511915	1.13042	0.487635
1.16127	0.65552	1.16127	0.548075	0.65552	0.480816
	1.43981			1.43981	0.448927
0.945745	1.37114	0.945745	0.296795	1.37114	0.5755
1.08037	0.678798	1.08037	0.41961	0.678798	0.44112
0.867027	0.879056	0.867027	0.573974	0.879056	0.453235
0.812958	1.01189	0.812958	0.581145	1.01189	0.566856
0.883304	0.856586	0.883304	0.438864	0.856586	0.449583
1.11767	1.23452	1.11767	0.44043	1.23452	0.570871
0.725887	1.19805	0.725887	0.443709	1.19805	0.684577
0.938961	0.918149	0.938961	0.487641	0.918149	0.719449
0.722071	0.860442	0.722071	0.515704	0.860442	0.587197
1.10813	0.758594	1.10813	0.547969	0.758594	0.399626
1.00779	0.580388	1.00779	0.588624	0.580388	0.37357
1.20961	0.681795	1.20961	0.404477	0.681795	0.386443
1.09611		1.09611	0.468119
0.949644	0.570822	0.949644	0.370872
1.19921	0.592405	1.19921	0.375696
1.31383	0.454277	1.31383	0.459456
1.16853	0.609243	1.16853	0.583512
1.26846	0.6354	1.26846	0.44908
1.10769	0.63052	1.10769	0.53694
1.27324	0.433762	1.27324	0.762933
	0.404197
0.382179	0.447986
0.437119	0.397578
0.483182	0.473349
0.477347	0.798406
0.304192	0.419085
0.398666	0.428067
0.346891	0.50464
0.464295	0.476082
0.486086	0.554267
0.394486	0.537376
0.339711
0.494204	0.67349
0.503015	0.537292
0.477958	0.54729
0.528413	0.391275
0.494016	0.519121
0.489337	0.597126
0.510925	0.388052
0.330141	0.408615
0.27727	0.385878
	0.554994
0.585797	0.447912
0.613421	0.48199
0.535629	0.503013
0.470552	0.432421
0.548299	0.381433
0.557069	0.42447
0.368677	0.576483
0.396257	0.372143
0.313901
0.346853	0.425844
0.357882	0.546093
0.303505	0.4713
0.513197	0.511767
0.568927	0.484133
0.457101	0.490569
0.588695	0.517992
0.688653	0.501078
0.473816	0.533654
0.381239	0.500395
0.615881	0.480773
	0.56646
0.455271	0.509299
0.646603	0.50491
0.507501	0.577054
0.525309	0.47356
0.44883	0.490732
0.421295	0.505642
0.533336
0.456827	0.435186
0.41075	0.402661
0.438778	0.442189
0.480195	0.487635
0.374414	0.480816
0.522423	0.448927
0.377928	0.5755
0.457328	0.44112
0.3718	0.453235
0.398497	0.566856
0.603068	0.449583
0.511915	0.570871
0.548075	0.684577
	0.719449
0.296795	0.587197
0.41961	0.399626
0.573974	0.37357
0.581145	0.386443
0.438864
0.44043
0.443709
0.487641
0.515704
0.547969
0.588624
0.404477
0.468119
0.370872
0.375696
0.459456
0.583512
0.44908
0.53694
0.762933

## Sheet: Figure 4F Data
# of Myofibrils / Fiber CSA (µm2)
EM ALL	THUNDER ALL	Oxidative (EM)	Nonox (EM)	Oxidative (THUN)	Nonox (THUN)
1.14976	1.44298	1.14976	1.0983	1.44298	1.37412
0.862484	1.40823	0.862484	1.30128	1.40823	1.30538
1.31491	1.47081	1.31491	0.901816	1.47081	1.32743
1.42915	1.23301	1.42915	1.18545	1.23301	1.06924
1.61452	1.5097	1.61452	1.35341	1.5097	1.06807
1.38839	1.41185	1.38839	1.194	1.41185	1.11239
1.32024	1.57204	1.32024	1.63271	1.57204	1.18299
1.36044	1.43357	1.36044	1.12628	1.43357	1.20621
1.65307	1.41854	1.65307	1.35796	1.41854	1.20047
1.138	1.45447	1.138	1.16403	1.45447	1.21548
1.16711	1.53075	1.16711	1.20754	1.53075	1.23639
1.13429	1.41101	1.13429	1.33762	1.41101	1.12553
1.34357	1.45129	1.34357	1.21619	1.45129	1.28503
1.46406	1.41338	1.46406	1.11465	1.41338	1.46668
1.51645	1.36922	1.51645	0.953514	1.36922	1.2606
1.6589	1.53424	1.6589	1.35464	1.53424	1.20093
1.70199	1.57701	1.70199	1.41201	1.57701	1.19835
2.19871	1.49686	2.19871	1.48107	1.49686	1.25505
1.78909		1.78909	1.47354
1.35135	1.34348	1.35135	1.50153	1.34348	0.852694
	1.34748			1.34748	0.853349
1.89152	1.4983	1.89152	1.09918	1.4983	1.0421
1.76084	1.31068	1.76084	1.03202	1.31068	1.0583
1.12948	1.46591	1.12948	1.04272	1.46591	0.856456
1.37189	1.50069	1.37189	1.08718	1.50069	0.904326
1.278	1.3351	1.278	1.3676	1.3351	1.27445
1.19481	1.40914	1.19481	1.1029	1.40914	1.3408
0.967213	1.37776	0.967213	1.09173	1.37776	1.4865
1.0507	1.56073	1.0507	1.04068	1.56073	1.22344
1.15227	1.56676	1.15227	1.06065	1.56676	1.01507
1.09658	1.44481	1.09658	1.15176	1.44481	1.44699
1.08091	1.4437	1.08091	0.924803	1.4437	1.28332
1.19452	1.42225	1.19452	1.14118	1.42225	1.21864
1.72619	1.45911	1.72619	1.25073	1.45911	1.27861
1.73736	1.29987	1.73736	1.07791	1.29987	1.18531
1.04293	1.33513	1.04293	1.1214	1.33513	1.18464
1.20012	1.48234	1.20012	0.894009	1.48234	1.29551
1.15213		1.15213	0.71287
1.16708	1.51297	1.16708	0.896695	1.51297	1.19149
1.98333	1.46726	1.98333	0.942146	1.46726	1.20355
1.10956	1.38912	1.10956	0.756084	1.38912	1.29807
	1.46297			1.46297	1.11273
1.21416	1.363	1.21416	1.23803	1.363	1.18823
0.976561	1.41715	0.976561	1.06768	1.41715	1.14261
1.02105	1.49243	1.02105	0.906379	1.49243	1.06639
1.22873	1.36784	1.22873	1.06391	1.36784	0.99487
1.17111	1.42945	1.17111	1.01842	1.42945	1.07066
1.22379	1.38183	1.22379	1.00331	1.38183	0.998682
1.29524	1.43813	1.29524	1.03744	1.43813	0.98581
1.16447	1.61443	1.16447	1.00746	1.61443	1.06156
1.63889	1.5037	1.63889	1.1343	1.5037	1.09272
1.3212	1.28755	1.3212	0.937236	1.28755	1.05949
1.52529	1.43959	1.52529	1.33406	1.43959	1.22629
1.15769	1.44083	1.15769	1.23679	1.44083	1.17039
1.55834	1.37995	1.55834	1.32146	1.37995	1.1736
1.28525	1.44437	1.28525	1.14764	1.44437	1.14386
1.16918		1.16918	1.2684
1.24883	1.40496	1.24883	1.08268	1.40496	1.22252
1.54211	1.35383	1.54211	1.43642	1.35383	1.17483
1.80219	1.49319	1.80219	0.995867	1.49319	1.0951
1.21387	1.30721	1.21387	1.02267	1.30721	1.21695
1.7377	1.34507	1.7377	1.11796	1.34507	0.887958
	1.48206			1.48206	0.971051
1.46586	1.48239	1.46586	1.45318	1.48239	1.2266
1.13491	1.54731	1.13491	1.13119	1.54731	1.32673
1.43096	1.553	1.43096	0.961353	1.553	1.23168
1.4849	1.35725	1.4849	1.23866	1.35725	0.974227
1.41099	1.41681	1.41099	0.819783	1.41681	0.940064
1.50419	1.38203	1.50419	1.35475	1.38203	0.949641
1.4371	1.4013	1.4371	1.17814	1.4013	0.774579
1.38418	1.20337	1.38418	1.10913	1.20337	0.910645
1.54958	1.20249	1.54958	0.948987	1.20249	0.919158
1.43807	1.30615	1.43807	1.10406	1.30615	1.00856
1.18533	1.39257	1.18533	1.17281	1.39257	1.14504
1.15149	1.44294	1.15149	1.08409	1.44294	1.13808
1.49165		1.49165	0.936135
1.25428	1.37412	1.25428	1.25393
1.01562	1.30538	1.01562	1.10421
0.942856	1.32743	0.942856	1.08731
1.24636	1.06924	1.24636	0.998695
1.45972	1.06807	1.45972	0.741754
1.20143	1.11239	1.20143	1.01935
1.40995	1.18299	1.40995	0.997048
	1.20621
1.0983	1.20047
1.30128	1.21548
0.901816	1.23639
1.18545	1.12553
1.35341	1.28503
1.194	1.46668
1.63271	1.2606
1.12628	1.20093
1.35796	1.19835
1.16403	1.25505
1.20754
1.33762	0.852694
1.21619	0.853349
1.11465	1.0421
0.953514	1.0583
1.35464	0.856456
1.41201	0.904326
1.48107	1.27445
1.47354	1.3408
1.50153	1.4865
	1.22344
1.09918	1.01507
1.03202	1.44699
1.04272	1.28332
1.08718	1.21864
1.3676	1.27861
1.1029	1.18531
1.09173	1.18464
1.04068	1.29551
1.06065
1.15176	1.19149
0.924803	1.20355
1.14118	1.29807
1.25073	1.11273
1.07791	1.18823
1.1214	1.14261
0.894009	1.06639
0.71287	0.99487
0.896695	1.07066
0.942146	0.998682
0.756084	0.98581
	1.06156
1.23803	1.09272
1.06768	1.05949
0.906379	1.22629
1.06391	1.17039
1.01842	1.1736
1.00331	1.14386
1.03744
1.00746	1.22252
1.1343	1.17483
0.937236	1.0951
1.33406	1.21695
1.23679	0.887958
1.32146	0.971051
1.14764	1.2266
1.2684	1.32673
1.08268	1.23168
1.43642	0.974227
0.995867	0.940064
1.02267	0.949641
1.11796	0.774579
	0.910645
1.45318	0.919158
1.13119	1.00856
0.961353	1.14504
1.23866	1.13808
0.819783
1.35475
1.17814
1.10913
0.948987
1.10406
1.17281
1.08409
0.936135
1.25393
1.10421
1.08731
0.998695
0.741754
1.01935
0.997048
