# Supplementary material for: A novel imaging method (FIM-ID) reveals that myofibrillogenesis plays a major role in the mechanically induced growth of skeletal muscle
Source: eLife. 2024 Mar 11;12:RP92674. doi: 10.7554/eLife.92674 (PMC10928493; doi:10.7554/eLife.92674)
Supplement: Figure 5—source data 1. [file elife-92674-fig5-data1.xlsx]

## Sheet: Figure 5C Data
	Fiber CSA (µm2)				Fiber CSA (µm2)				Fiber CSA (µm2)
ALL	Sham	MOV		Oxidative	Sham	MOV		Glycolytic	Sham	MOV
	917.153	1350.75			601.234	949.598			1233.07	1751.91
	908.514	1078.16			669.096	763.636			1147.93	1392.68
	941.852	1122.71			652.24	788.817			1231.46	1623.54
	1071.51	1279.24			693.246	993.766			1449.77	1564.72
	1130.31	1531.74			679.315	1164.53			1556.25	1898.95
	1085.86	1183.46			782.966	838.802			1368.56	1700.44
	1005.49	1475.88			622.295	1096.81			1388.68	1854.95
	1072.42	1228.42			708.931	902.433			1435.9	1532.68
	1029.49	1634.21			720.789	1108.14			1338.18	2160.27
	1096.21	1440.06			714.447	1105.89			1477.98	1774.23
	1055.94	1366.13			739.906	942.537			1371.96	1789.73
		1282.84				956.075				1609.6
		1360.12				874.87				1845.37
		1299.9				985.648				1614.16
		1188.4				864.875				1511.93

## Sheet: Figure 5D Data
Myofibrillar Area
	Area Occupied / Fiber (µm2)				Area Occupied / Fiber (µm2)				Area Occupied / Fiber (µm2)
ALL	Sham	MOV		Oxidative	Sham	MOV		Glycolytic	Sham	MOV
	686.956	1025.3			438.817	705.911			935.096	1344.7
	685.714	840.085			499.383	587.273			872.045	1092.9
	708.879	864.321			488.744	596.797			929.014	1265.61
	822.093	979.332			526.693	750.52			1117.49	1208.15
	885.45	1201.83			520.178	906.265			1230.43	1497.4
	858.194	907.6			617.531	632.526			1082.81	1320.21
	785.48	1150.07			477.954	849.335			1093	1450.81
	871.281	978.696			576.986	706.962			1165.58	1232.31
	802.837	1288.85			558.651	860.432			1047.02	1717.27
	919.263	1133.89			595.062	865.164			1243.46	1402.62
	851.023	1112.27			594.922	760.406			1107.12	1464.14
		1018.81				751.63				1285.99
		1137.16				721.466				1552.86
		1049.77				788.974				1310.57
		941.583				676.749				1206.42

## Sheet: Figure 5E Data
Intermyofibrillar Area
	Area Occupied / Fiber (µm2)				Area Occupied / Fiber (µm2)				Area Occupied / Fiber (µm2)
ALL	Sham	MOV		Oxidative	Sham	MOV		Glycolytic	Sham	MOV
	230.196	325.45			162.417	243.687			297.975	407.214
	222.8	238.073			169.713	176.363			275.887	299.782
	232.973	258.387			163.497	192.02			302.449	357.938
	249.414	299.91			166.553	243.246			332.275	356.574
	244.858	329.909			159.136	258.269			325.817	401.548
	227.666	275.855			165.435	206.276			285.748	380.224
	220.007	325.807			144.34	247.476			295.673	404.138
	201.136	249.726			131.945	195.471			270.327	300.364
	226.649	345.358			162.138	247.709			291.161	443.007
	176.949	306.17			119.385	240.729			234.514	371.611
	204.912	253.861			144.984	182.131			264.84	325.591
		264.026				204.444				323.607
		222.957				153.404				292.511
		250.134				196.675				303.593
		246.818				188.126				305.509

## Sheet: Figure 5F Data
	Myofibril CSA (µm2)				Myofibril CSA (µm2)				Myofibril CSA (µm2)
ALL	Sham	MOV		Oxidative	Sham	MOV		Glycolytic	Sham	MOV
	0.549648	0.577399			0.506445	0.542203			0.549648	0.577399
	0.532842	0.593869			0.503957	0.558609			0.532842	0.594196
	0.542007	0.590018			0.511843	0.575029			0.542007	0.590018
	0.55959	0.600484			0.519618	0.58523			0.55959	0.600484
	0.654217	0.593869			0.564405	0.576359			0.739039	0.593869
	0.665916	0.602465			0.570694	0.581604			0.754791	0.602465
	0.629631	0.729514			0.555884	0.694511			0.703378	0.764518
	0.638143	0.714151			0.558312	0.661926			0.717974	0.762894
	0.625644	0.730561			0.568911	0.680138			0.682378	0.780983
	0.614078	0.714435			0.569935	0.663758			0.658222	0.765112
	0.591764	0.731614			0.556303	0.684256			0.627225	0.778971
		0.604979				0.588478				0.621481
		0.630187				0.635834				0.624539
		0.71082				0.656249				0.765391
		0.663736				0.629511				0.69796

## Sheet: Figure 5G Data
	Myofibrils / Fiber				Myofibrils / Fiber				Myofibrils / Fiber
ALL	Sham	MOV		Oxidative	Sham	MOV		Glycolytic	Sham	MOV
	1222.83	1746.36			866.2	1296.16			1579.46	2196.56
	1273.08	1395.57			992.428	1052.66			1553.73	1738.49
	1287.36	1447.13			955.01	1035.99			1619.71	2063.83
	1437.75	1617.15			1012.75	1289.4			1862.75	1944.89
	1304.51	2011.06			924.19	1583.16			1663.69	2438.96
	1258.01	1484.94			1073.39	1089.94			1430.33	2077.46
	1206.45	1569.97			860.575	1238.99			1552.33	1900.96
	1334.6	1346.34			1038.4	1061.51			1630.79	1612.18
	1248.87	1725.06			971.014	1266.27			1526.72	2183.85
	1468.8	1558.73			1051.8	1307.07			1885.81	1810.4
	1417.1	1507.33			1069.15	1117.39			1765.05	1897.27
		1675.75				1286.22				2065.28
		1816.23				1142.88				2489.58
		1457.44				1189.58				1725.3
		1397.26				1079.8				1714.71

## Sheet: Figure 5 - figure supplement 1 
SERCA1 Oxidative						SERCA1 Glycolytic
Myofibril CSA (% of Sham)	Fiber CSA (% of Sham)		Myofibrils Per Fiber (% of Sham)	Fiber CSA (% of Sham)		Myofibril CSA (% of Sham)	Fiber CSA (% of Sham)		Myofibrils Per Fiber (% of Sham)	Fiber CSA (% of Sham)
99.6312	137.723		131.834	137.723		89.8727	128.476		133.711	128.476
102.646	110.753		107.067	110.753		92.4872	102.132		105.827	102.132
105.663	114.405		105.372	114.405		91.8369	119.062		125.632	119.062
107.538	144.129		131.147	144.129		93.4659	114.748		118.392	114.748
105.907	168.896		161.025	168.896		92.4364	139.259		148.467	139.259
106.871	121.654		110.859	121.654		93.7743	124.701		126.461	124.701
127.618	159.074		126.02	159.074		118.998	136.032		115.717	136.032
121.631	130.883		107.968	130.883		118.745	112.398		98.1382	112.398
124.977	160.717		128.794	160.717		121.561	158.423		132.938	158.423
121.967	160.391		132.944	160.391		119.09	130.113		110.204	130.113
125.734	136.699		113.652	136.699		121.248	131.249		115.493	131.249
108.134	138.663		130.824	138.663		96.7341	118.039		125.72	118.039
116.836	126.885		116.244	126.885		97.2102	135.329		151.549	135.329
120.588	142.952		120.994	142.952		119.134	118.374		105.024	118.374
115.674	125.436		109.828	125.436		108.638	110.876		104.38	110.876
