# Supplementary material for: A novel imaging method (FIM-ID) reveals that myofibrillogenesis plays a major role in the mechanically induced growth of skeletal muscle
Source: eLife. 2024 Mar 11;12:RP92674. doi: 10.7554/eLife.92674 (PMC10928493; doi:10.7554/eLife.92674)
Supplement: Figure 6—source data 1. [file elife-92674-fig6-data1.xlsx]

## Sheet: Figure 6C Data
Fiber CSA (% of PRE)
	SERCA1				SERCA2
		PRE	POST			PRE	POST
	Human 1	100	116.43		Human 1	100	94.78
	Human 2	100	113.77		Human 2	100	98.15
	Human 3	100	129.05		Human 3	100	97.71
	Human 4	100	139.46		Human 4	100	112.54
	Human 5	100	108.19		Human 5	100	114.35
	Human 6	100	111		Human 6	100	104.55
	Human 7	100	106.24		Human 7	100	93.05

## Sheet: Figure 6D Data
Area Occupied / Fiber (% of PRE)
Myofibrillar	SERCA1				SERCA2
		PRE	POST			PRE	POST
	Human 1	100	114.62		Human 1	100	94.53
	Human 2	100	115.53		Human 2	100	99
	Human 3	100	128.98		Human 3	100	100.92
	Human 4	100	142.08		Human 4	100	111.88
	Human 5	100	109.63		Human 5	100	114.34
	Human 6	100	109.71		Human 6	100	103.14
	Human 7	100	105.66		Human 7	100	93.04

## Sheet: Figure 6E Data
Area Occupied / Fiber (% of PRE)
Intermyofibrillar	SERCA1				SERCA2
		PRE	POST			PRE	POST
	Human 1	100	123.83		Human 1	100	95.82
	Human 2	100	107.13		Human 2	100	94.9
	Human 3	100	129.34		Human 3	100	85.75
	Human 4	100	128.94		Human 4	100	115.25
	Human 5	100	102.59		Human 5	100	114.38
	Human 6	100	116.17		Human 6	100	110.63
	Human 7	100	108.75		Human 7	100	93.11

## Sheet: Figure 6F Data
Myofibril CSA (% of PRE)
	SERCA1				SERCA2
		PRE	POST			PRE	POST
	Human 1	100	108.84		Human 1	100	92.1
	Human 2	100	112.88		Human 2	100	104.53
	Human 3	100	108.75		Human 3	100	116.59
	Human 4	100	119.33		Human 4	100	110.45
	Human 5	100	117.88		Human 5	100	118.16
	Human 6	100	90.45		Human 6	100	97.82
	Human 7	100	87.39		Human 7	100	101.66

## Sheet: Figure 6G Data
Myofibrils / Fiber (% of PRE)
	SERCA1				SERCA2
		PRE	POST			PRE	POST
	Human 1	100	106.86		Human 1	100	102.82
	Human 2	100	102.97		Human 2	100	94.89
	Human 3	100	119.24		Human 3	100	86.53
	Human 4	100	118.91		Human 4	100	102.3
	Human 5	100	94.15		Human 5	100	96.6
	Human 6	100	119.38		Human 6	100	108.17
	Human 7	100	123.45		Human 7	100	92.54

## Sheet: Figure 6 - figure supplement 1
SERCA1						SERCA2
Myofibril CSA (% of Sham)	Fiber CSA (% of Sham)		Myofibrils Per Fiber (% of Sham)	Fiber CSA (% of Sham)		Myofibril CSA (% of Sham)	Fiber CSA (% of Sham)		Myofibrils Per Fiber (% of Sham)	Fiber CSA (% of Sham)
108.84	103.48		106.86	103.48		92.1	94.78		102.82	94.78
112.88	121.31		102.97	121.31		98.153	98.15		94.89	98.15
108.75	109.27		119.24	109.27		97.719	97.71		86.53	97.71
119.33	124.47		118.91	124.47		112.54	112.54		102.3	112.54
117.88	89		94.15	89		114.35	114.35		96.6	114.35
90.45	133.99		119.38	133.99		97.82	104.55		108.17	104.55
87.39	135.56		123.45	135.56		93.056	93.05		92.54	93.05
